# Supplementary material
Source: publisher figshare collection journal article supplement (https://frontiersin.figshare.com/ndownloader/files/11475287)
Supplement: Supplementary file [file 11475287]

## **SUPPLEMENTARY INFORMATION TO:**

### **Synergy of Sodium Nitroprusside and Nitrate in Inhibiting the Activity of Sulfate Reducing Bacteria in Oil-Containing Bioreactors**

Tekle Tafese Fida, Johanna Voordouw, Maryam Ataeian, Manuel Kleiner, Gloria Okpala, Jaspreet Mand, and Gerrit Voordouw

#### **Sample processing and proteomic analysis**

##### **Extraction of Protein**

Protein was extracted from the pellets using tryptic digest following the filter-aided sample preparation (FASP) protocol described by Wisniewski *et al.* (Wisniewski et al., 2009) with minor modifications to the protocol as described by Hamann *et al.* (Hamann et al., 2016). Protein concentrations were determined using the Pierce Micro BCA assay (Thermo Scientific Pierce, Rockford, IL, USA) following the manufacturer's instructions.

##### **1D-LC-MS/MS**

Samples were analyzed by one-dimensional LC-MS/MS using a block-randomized design (Oberg and Vitek, 2009). To reduce carry over, two wash runs and one blank run were programmed between samples. For each run, 1200 ng of extracted peptides were loaded onto a 5 mm, 300  $\mu$ m ID C18 Acclaim® PepMap100 pre-column (Thermo Fisher Scientific) using an UltiMate™ 3000 RSLCnano Liquid Chromatograph (Thermo Fisher Scientific) and desalted on the pre-column. Peptides were then transferred to a 50 cm x 75  $\mu$ m analytical EASY-Spray column packed with PepMap RSLC C18, 2  $\mu$ m material (Thermo Fisher Scientific), which was heated to 45 °C. The analytical column was connected to a Q Exactive Plus hybrid quadrupole-Orbitrap mass spectrometer (Thermo Fisher Scientific) via an Easy-Spray source. Peptides were separated on the analytical column at a flow rate of 225 nL min<sup>-1</sup> using a 260 minute gradient and mass spectra acquired in the Orbitrap as described before (Petersen et al., 2016). Around 140,000 MS/MS spectra were acquired per sample.

### **Protein Identification, Quantification and Statistics**

A database for *D. vulgaris* Hildenborough was generated using the *D. vulgaris* proteome from Uniprot (UP000002194) containing all protein sequences derived from the genome. The cRAP protein sequence database (<http://www.thegpm.org/crap/>) with common laboratory contaminating proteins was added to the database. The final database contained 3634 protein sequences. The database was submitted to the PRIDE repository (see below). Protein identification was performed by searching the MS/MS spectra against the database using the Sequest HT node in Proteome Discoverer version 2.0.0.802 (Thermo Fisher Scientific) as described previously (Petersen et al., 2016). The search results for all samples were combined into a multiconsensus report using the FidoCT node in Proteome Discoverer restricting the protein-level false discovery rate (FDR) to below 5% (FidoCT q-value <0.05) (Serang et al., 2010). High confidence identifications included proteins with a FidoCT q-value of <0.01 and medium confidence identifications included proteins with a FidoCT q-value of 0.01-0.05. Based on these filtering criteria a total of 1127 proteins were identified in all samples together. Further processing was done on the multiconsensus report which was exported as a tab-delimited file.

Protein quantification was performed using Normalized Spectral Abundance Factors (NSAFs) for the proteins based on the number of peptide spectral matches (PSMs) per protein using the method described by Florens *et al.* (2006). The relative abundance of a protein in a sample in % was calculated by multiplying the NSAF with 100 resulting in NSAF%.

For statistical analyses, the table with NSAFs was loaded into the Perseus software (version 1.5.6.0) (Tyanova et al., 2016). Proteins that had at least four NSAF values greater than 0 in either control or treatment samples were retained for analysis, all others were discarded. NSAF values were transformed by applying the  $\log_2$ . Missing values produced by  $\log_2(0)$  were replaced by sampling from a normal distribution assuming that the missing values were on the lower end of abundance. A student t-test was done to detect proteins with significant difference in their expression level between control and treatment using a permutation-based FDR calculation to account for the multiple testing problems. The following parameters were used for the test: groupings

were not preserved for randomizations, both sides, 250 randomizations, FDR of 0.05 and s0 of 0.

### Data Availability

The mass spectrometry proteomics data and the protein sequence database have been deposited to the ProteomeXchange Consortium (Vizcaino et al., 2014) via the PRIDE partner repository with the dataset identifier PXD007623. [Reviewer access: log in at <http://www.ebi.ac.uk/pride/archive/> with username: reviewer89475@ebi.ac.uk and password: 8ZJm7Quh].

## SUPPLEMENTARY FIGURES

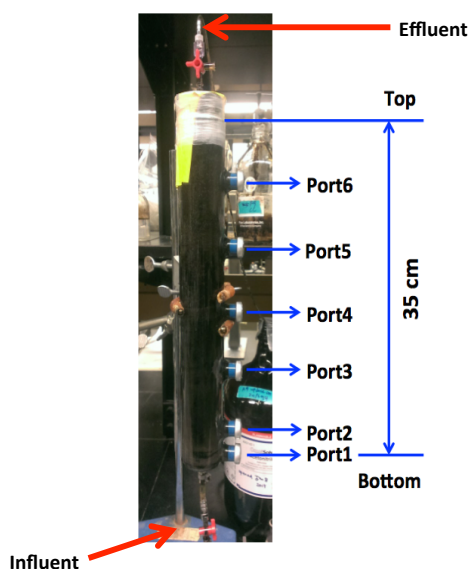

**FIGURE S1** | Image of sand packed oil column showing the locations of sampling ports within the column.

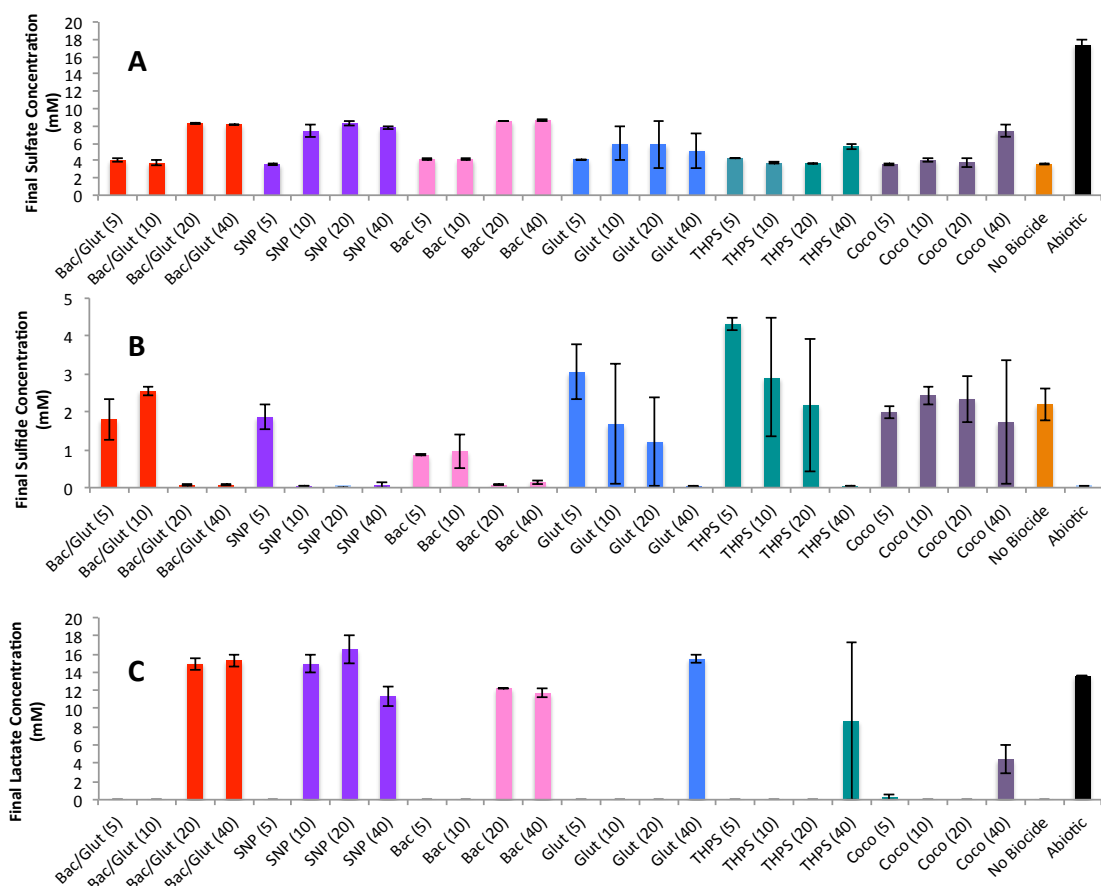

**FIGURE S2** | Comparison of effect of SNP and other biocides at 5, 10, 20 or 40 ppm added at the start of growth on souring and corrosion. Concentrations of (A) sulfide, (B) sulfate, and (C) lactate were determined after one month of incubation at 23 °C with shaking in duplicate.

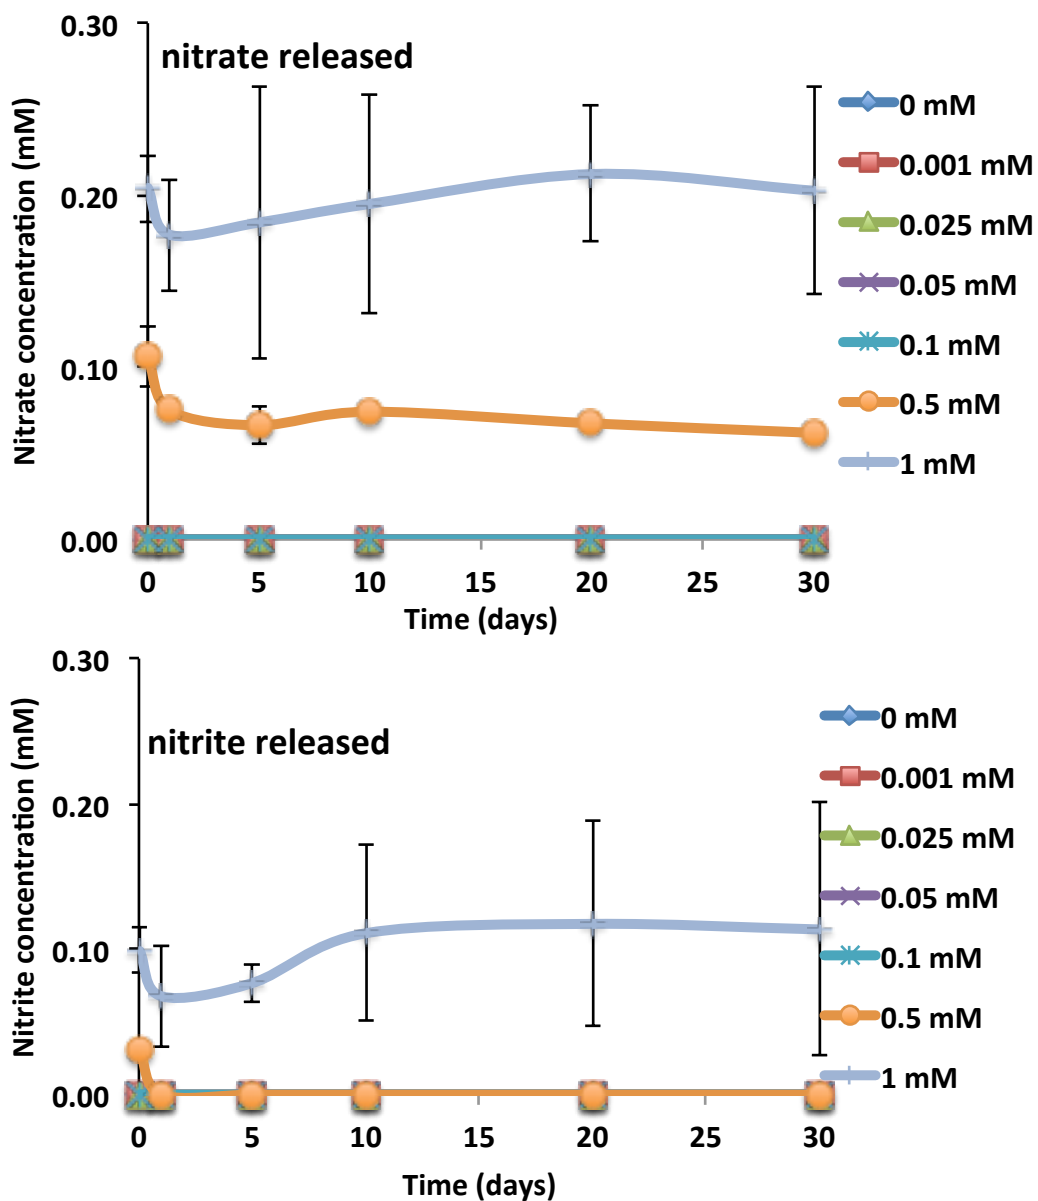

**FIGURE S3** | Concentrations of nitrate and nitrite detected in mid-log phase cultures of mesophilic SRB consortia as shown in Figure 2A and 2B after addition of different concentrations of SNP.

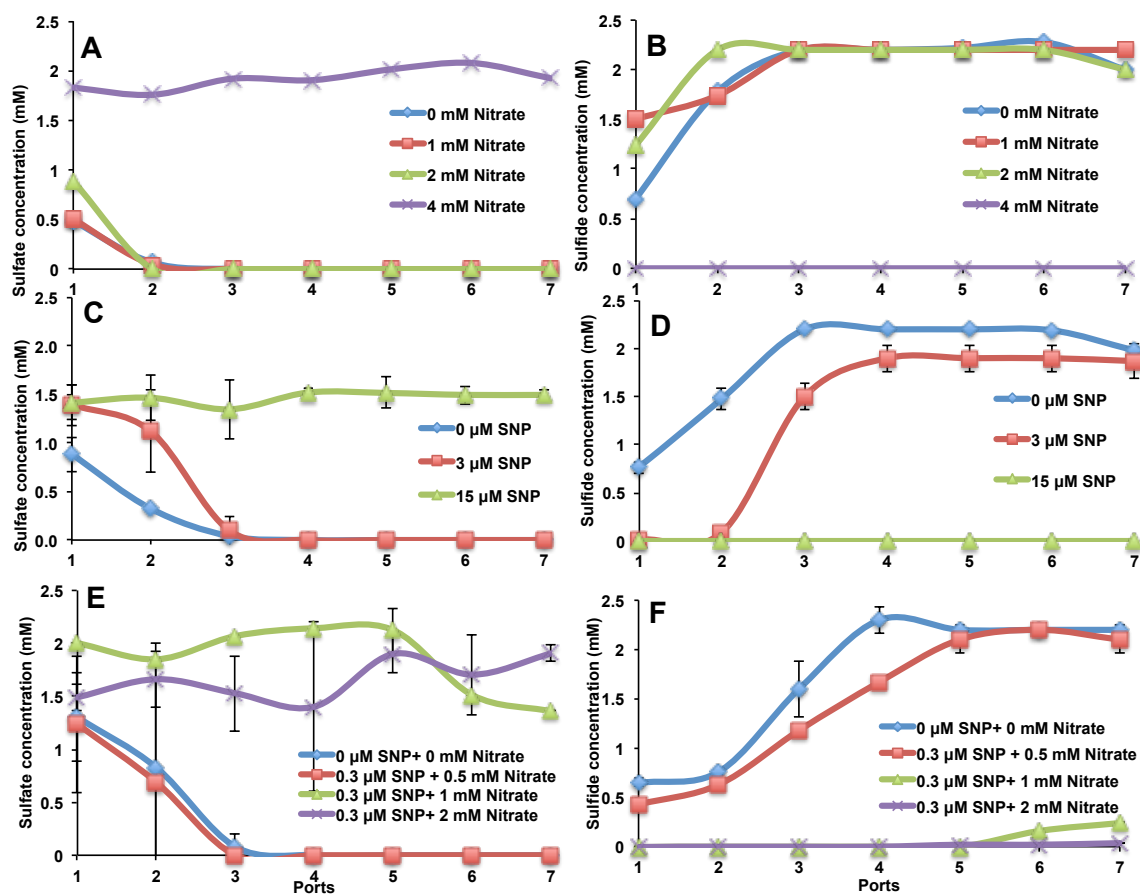

**FIGURE S4** | Sulfate and sulfide concentrations at the different ports (x-axes) of the oil-containing bioreactors. Sulfate concentration in bioreactors treated with nitrate (A), sulfide concentration in bioreactors treated with nitrate (B), sulfate concentration in bioreactors treated with SNP (C), sulfide concentration in bioreactors treated with SNP (D), sulfate concentration in bioreactors treated with SNP and nitrate combination (E), sulfide concentration in bioreactors treated with SNP and nitrate combination (F). Port 7 is the effluent of the bioreactors. Samples were obtained from the ports after each treatment with two pore volumes (PV) of SNP, nitrate or SNP and nitrate.

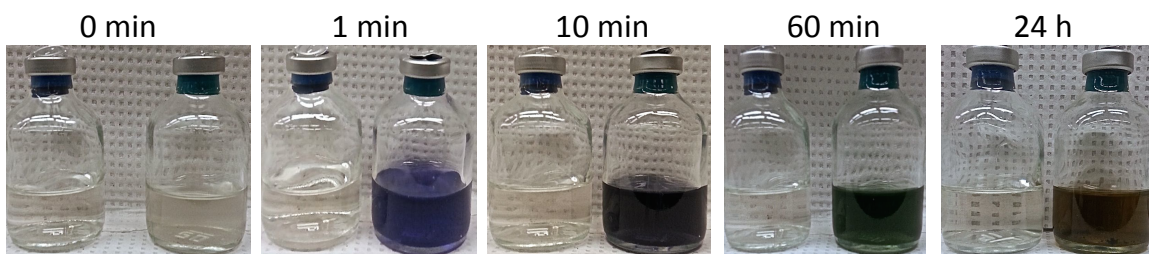

**FIGURE S5** | Time-dependent change in color of serum bottles, containing CSBK medium with 0 mM (left) or 2 mM (right) of sulfide from the activity of mSRB. SNP (0.5 mM) was added to both bottles and colour development was monitored as a function of time.

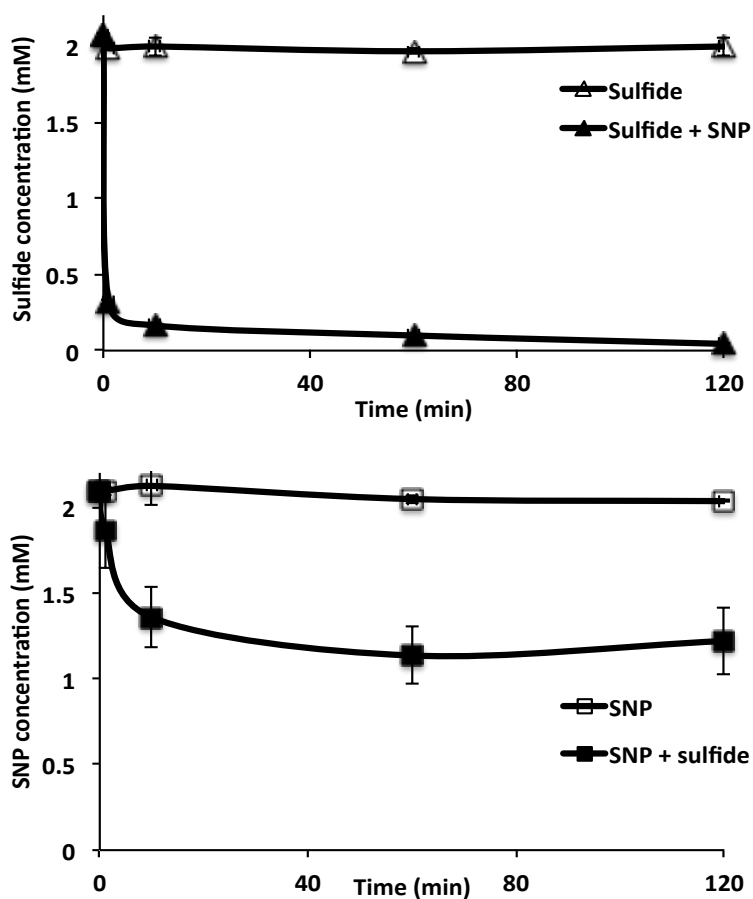

**FIGURE S6** | Change in sulfide concentration (A) and SNP concentration (B) after reaction of 2 mM of SNP with 2 mM of sulfide. Controls were 2 mM sulfide without SNP (A) or 2 mM SNP without sulfide (B).

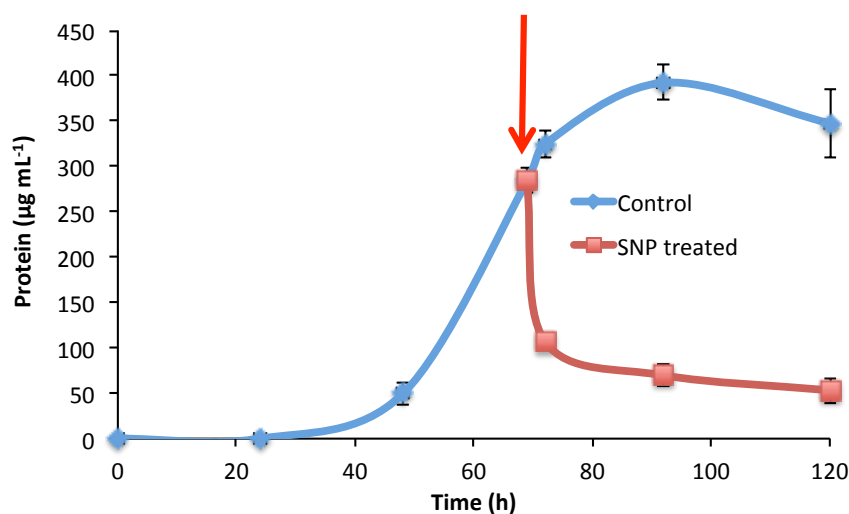

**FIGURE S7** | Growth of *Desulfovibrio vulgaris* Hildenborough in Postgate medium C. SNP was added to the culture at the mid log phase of growth (↓).

**TABLE S1** | Significantly expressed proteins of *Desulfovibrio vulgaris* Hildenborough in the presence or absence of sodium nitroprusside (0.25 mM)

| Accession | Description                                    | Average expression in SNP | Average expression in control |
|-----------|------------------------------------------------|---------------------------|-------------------------------|
| Q72CM3    | Outer membrane protein P1, putative            | 0.06                      | 0.03                          |
| Q728F1    | Uncharacterized protein                        | 0.02                      | 0.01                          |
| Q72CK2    | Uncharacterized protein                        | 0.02                      | 0.01                          |
| Q72FE1    | Uncharacterized protein                        | 0.02                      | 0.01                          |
| Q72A92    | Uncharacterized protein                        | 0.09                      | 0.05                          |
| Q725Z3    | Uncharacterized protein                        | 0.06                      | 0.04                          |
| Q728N2    | Ferrous iron transport protein B               | 0.02                      | 0.01                          |
| P24092    | High-molecular-weight cytochrome c             | 0.03                      | 0.02                          |
| Q72DG2    | Amino acid ABC transporter, permease protein   | 0.03                      | 0.02                          |
| P33389    | Protein DVU_0535                               | 0.04                      | 0.02                          |
| Q72DS8    | Uncharacterized protein                        | 0.24                      | 0.17                          |
| Q72BJ9    | Inorganic pyrophosphatase, manganese-dependent | 1.19                      | 0.81                          |
| Q726K3    | Peptidoglycan-associated lipoprotein, putative | 1.27                      | 0.88                          |
| Q72E00    | ATP synthase subunit b                         | 0.20                      | 0.14                          |
| Q729V1    | Antioxidant, AhpC/Tsa family                   | 0.19                      | 0.13                          |
| Q72EB0    | Methyl-accepting chemotaxis protein            | 0.05                      | 0.04                          |
| Q728N1    | Ferrous iron transport protein A, putative     | 0.05                      | 0.03                          |
| Q726E1    | Pyridine nucleotide-disulfide oxidoreductase   | 0.30                      | 0.21                          |
| Q72C29    | Uncharacterized protein                        | 0.23                      | 0.16                          |
| Q72DZ9    | ATP synthase F0, B' subunit, putative          | 0.32                      | 0.23                          |
| Q727U7    | Cyclic dehypoxanthine futasine synthase        | 0.03                      | 0.02                          |
| Q72DY2    | Uncharacterized protein                        | 0.58                      | 0.43                          |
| Q727W6    | Methyl-accepting chemotaxis protein            | 0.08                      | 0.06                          |

|        |                                                                  |      |      |
|--------|------------------------------------------------------------------|------|------|
| Q72CH2 | 50S ribosomal protein L29                                        | 0.52 | 0.38 |
| Q72DT1 | Heterodisulfide reductase, putative                              | 0.40 | 0.30 |
| Q72EX0 | GDP-mannose 4,6-dehydratase                                      | 0.10 | 0.07 |
| Q726F8 | Ribosomal protein S1                                             | 0.54 | 0.40 |
| Q72FQ1 | Carbamoyl-phosphate synthase                                     | 0.05 | 0.04 |
| Q72DW8 | Chaperone protein DnaK                                           | 0.33 | 0.25 |
| Q728V3 | Cell division protein FtsZ                                       | 0.08 | 0.06 |
| Q72CH4 | 30S ribosomal protein S3                                         | 0.66 | 0.50 |
| Q729X1 | Acetyl-CoA carboxylase, biotin carboxylase, putative             | 0.16 | 0.12 |
| Q72AR0 | Adenylate kinase                                                 | 0.55 | 0.42 |
| Q728G0 | Chaperone protein HtpG                                           | 0.08 | 0.07 |
| Q727E1 | Peptide chain release factor 1                                   | 0.05 | 0.04 |
| Q72B07 | Phosphoenolpyruvate synthase, putative                           | 0.18 | 0.14 |
| Q72E02 | ATP synthase subunit alpha                                       | 0.66 | 0.52 |
| Q72E04 | ATP synthase subunit beta                                        | 0.73 | 0.58 |
| Q72D62 | Membrane protein, Bmp family                                     | 0.17 | 0.14 |
| Q72C14 | Peptidylprolyl isomerase                                         | 0.50 | 0.40 |
| P45574 | Sulfite reductase, dissimilatory-type subunit alpha              | 0.91 | 0.73 |
| Q72CG6 | 30S ribosomal protein S8                                         | 0.69 | 0.55 |
| P61522 | Argininosuccinate synthase                                       | 0.10 | 0.08 |
| Q72CG3 | 30S ribosomal protein S5                                         | 0.57 | 0.46 |
| Q72G03 | Efflux transporter, RND family, MFP subunit                      | 0.10 | 0.08 |
| Q72ER1 | Translation initiation factor IF-2                               | 0.12 | 0.10 |
| Q72DT0 | Heterodisulfide reductase, iron-sulfur-binding subunit, putative | 0.33 | 0.28 |
| Q727C7 | DNA-directed RNA polymerase subunit beta                         | 0.15 | 0.13 |
| Q72C16 | Peptidase/PDZ domain protein                                     | 0.10 | 0.09 |
| Q72CA6 | Ketol-acid reductoisomerase (NADP(+))                            | 0.36 | 0.44 |
| Q72AS8 | Aspartokinase                                                    | 0.06 | 0.07 |
| Q72CH7 | 50S ribosomal protein L2                                         | 0.27 | 0.33 |
| Q72FD1 | AhpF family protein/thioredoxin reductase                        | 0.06 | 0.07 |
| Q729I6 | Aminotransferase, classes I and II                               | 0.05 | 0.07 |
| Q725N2 | Glutamine synthetase, type I                                     | 0.04 | 0.05 |
| Q72A88 | Iron-sulfur cluster carrier protein                              | 0.25 | 0.32 |
| Q72E67 | Amino acid ABC transporter, periplasmic-binding                  | 0.12 | 0.16 |
| Q72DH6 | Tyrosine--tRNA ligase                                            | 0.07 | 0.10 |
| Q72BS5 | Aldehyde oxidoreductase                                          | 0.08 | 0.11 |
| Q72CQ5 | Probable thiol peroxidase                                        | 0.23 | 0.31 |
| Q72DH2 | 30S ribosomal protein S18                                        | 0.24 | 0.33 |
| Q72EL3 | Glyceraldehyde-3-phosphate dehydrogenase                         | 0.06 | 0.08 |
| Q72DG5 | Glu/Leu/Phe/Val dehydrogenase family protein                     | 0.02 | 0.02 |
| Q72A89 | MTH1175-like domain family protein                               | 0.31 | 0.44 |
| Q727S1 | Dehydrogenase, FMN-dependent family                              | 0.09 | 0.12 |
| Q725I1 | Glutamate-1-semialdehyde 2,1-aminomutase                         | 0.08 | 0.12 |
| Q72FG1 | Oxidoreductase, FAD/iron-sulfur cluster-binding                  | 0.07 | 0.10 |
| Q729K3 | Acetylornithine aminotransferase                                 | 0.02 | 0.03 |
| Q72BH2 | Probable GTP-binding protein EngB                                | 0.02 | 0.03 |
| Q72FH2 | MTH1175-like domain family protein                               | 0.24 | 0.35 |
| Q72DQ8 | Uridylate kinase                                                 | 0.06 | 0.08 |

|        |                                                                        |      |      |
|--------|------------------------------------------------------------------------|------|------|
| Q72DF0 | DAK1 domain protein                                                    | 0.07 | 0.11 |
| Q726H4 | Glycerol kinase                                                        | 0.01 | 0.02 |
| Q06173 | Periplasmic [NiFe] hydrogenase small subunit 1                         | 0.10 | 0.16 |
| Q726I8 | AMP-binding enzyme family protein                                      | 0.01 | 0.02 |
| Q725W5 | ATP-dependent RNA helicase, DEAD/DEAH family                           | 0.07 | 0.10 |
| Q72C43 | Flagellin                                                              | 0.02 | 0.03 |
| Q72CF7 | 30S ribosomal protein S13                                              | 0.20 | 0.32 |
| Q726Y0 | Uncharacterized protein                                                | 0.01 | 0.01 |
| Q72F29 | Amino acid ABC transporter, periplasmic amino acid-binding protein     | 0.07 | 0.11 |
| Q72EN0 | Periplasmic branched chain amino acid-binding protein                  | 0.19 | 0.31 |
| Q72FN6 | Molybdenum ABC transporter, periplasmic molybdenum-binding protein     | 0.09 | 0.15 |
| Q728R7 | 50S ribosomal protein L35                                              | 0.19 | 0.33 |
| Q72CS2 | 50S ribosomal protein L28                                              | 0.39 | 0.67 |
| Q728R0 | Hydroxylamine reductase                                                | 0.04 | 0.06 |
| Q72AT0 | CBS domain protein                                                     | 0.05 | 0.09 |
| Q729Q3 | Glycine/betaine/L-proline ABC transporter, periplasmic-binding protein | 0.02 | 0.03 |
| Q72B13 | Uncharacterized protein                                                | 0.08 | 0.14 |
| Q72A94 | Iron-sulfur cluster-binding/ATPase domain protein                      | 0.09 | 0.15 |
| Q72DQ5 | 30S ribosomal protein S2                                               | 0.32 | 0.57 |
| P20418 | Desulfoferrodoxin                                                      | 0.24 | 0.43 |
| P61654 | 2-dehydro-3-deoxyphosphooctonate aldolase                              | 0.01 | 0.02 |
| Q72EV8 | 2-amino-3,7-dideoxy-D-threo-hept-6-ulosonate synthase                  | 0.24 | 0.45 |
| Q72E57 | Response regulator                                                     | 0.00 | 0.01 |
| Q728X5 | Phosphate ABC transporter, periplasmic phosphate-binding protein PstS  | 0.01 | 0.02 |
| Q726Q9 | Aminotransferase, class IV                                             | 0.01 | 0.03 |
| Q728R8 | 50S ribosomal protein L20                                              | 0.09 | 0.18 |
| Q72EV6 | Chorismate mutase/prephenate dehydratase                               | 0.03 | 0.06 |
| Q727E3 | 50S ribosomal protein L31                                              | 0.08 | 0.16 |
| Q72G54 | Universal stress protein family                                        | 0.01 | 0.03 |
| Q725Y1 | Thiamine pyrophosphate-requiring enzyme                                | 0.01 | 0.02 |
| Q72EV7 | Predicted 3-dehydroquinate synthase                                    | 0.08 | 0.17 |
| Q72EV5 | 3-phosphoshikimate 1-carboxyvinyltransferase                           | 0.02 | 0.05 |
| Q72CP5 | Amino acid ABC transporter, periplasmic amino acid-binding protein     | 0.07 | 0.16 |
| Q72CF6 | 30S ribosomal protein S11                                              | 0.12 | 0.28 |
| Q72EZ5 | Universal stress protein family                                        | 0.03 | 0.07 |
| Q725Y0 | Aldehyde dehydrogenase (NADP) family protein                           | 0.01 | 0.02 |
| Q725R8 | NAD-dependent epimerase/dehydratase family protein                     | 0.02 | 0.04 |
| Q729L9 | Smr family protein                                                     | 0.01 | 0.02 |
| Q72EU7 | Tryptophan synthase alpha chain                                        | 0.10 | 0.29 |
| Q72FX8 | Tryptophan synthase beta chain                                         | 0.08 | 0.23 |
| P04032 | Cytochrome c-553                                                       | 0.09 | 0.26 |
| Q728C1 | L-lactate permease family protein                                      | 0.00 | 0.01 |
| Q727Q1 | Metallo-beta-lactamase family protein                                  | 0.01 | 0.02 |
| Q72EU8 | Tryptophan synthase beta chain                                         | 0.08 | 0.26 |
| Q72EV3 | Anthranilate synthase, component I                                     | 0.05 | 0.17 |
| Q72FH3 | Uncharacterized protein                                                | 0.01 | 0.04 |
| Q72F96 | TPR domain protein                                                     | 0.02 | 0.07 |
| Q72C64 | Hpt domain protein                                                     | 0.01 | 0.02 |

|        |                                                             |      |      |
|--------|-------------------------------------------------------------|------|------|
| Q72E06 | Uncharacterized protein                                     | 0.03 | 0.13 |
| Q72EV2 | Anthranilate synthase, glutamine amidotransferase component | 0.03 | 0.15 |
| Q72EV1 | Anthranilate phosphoribosyltransferase                      | 0.04 | 0.19 |
| Q72EV0 | Indole-3-glycerol phosphate synthase                        | 0.03 | 0.16 |

## References

- Florens, L., Carozza, M.J., Swanson, S.K., Fournier, M., Coleman, M.K., Workman, J.L., et al. (2006). Analyzing chromatin remodeling complexes using shotgun proteomics and normalized spectral abundance factors. *Methods* 40, 303-311. doi: 10.1016/j.ymeth.2006.07.028
- Hamann, E., Gruber-Vodicka, H., Kleiner, M., Tegetmeyer, H.E., Riedel, D., Littmann, S., et al. (2016). Environmental Breviatea harbour mutualistic *Arcobacter* epibionts. *Nature* 534, 254-258. doi: 10.1038/nature18297
- Oberg, A.L., and Vitek, O. (2009). Statistical design of quantitative mass spectrometry-based proteomic experiments. *J. Proteome. Res.* 8, 2144-2156. doi: 10.1021/pr8010099
- Petersen, J.M., Kemper, A., Gruber-Vodicka, H., Cardini, U., Van Der Geest, M., Kleiner, M., et al. 2016. Chemosynthetic symbionts of marine invertebrate animals are capable of nitrogen fixation. *Nature Microbiology* [Online], 2. Available: <http://dx.doi.org/10.1038/nmicrobiol.2016.195>.
- Serang, O., Maccoss, M.J., and Noble, W.S. (2010). Efficient marginalization to compute protein posterior probabilities from shotgun mass spectrometry data. *J. Proteome Res.* 9, 5346-5357. doi: 10.1021/pr100594k
- Tyanova, S., Temu, T., Sinitcyn, P., Carlson, A., Hein, M.Y., Geiger, T., et al. (2016). The Perseus computational platform for comprehensive analysis of (prote)omics data. *Nat. Methods.* 13, 731-740. doi: 10.1038/nmeth.3901
- Vizcaino, J.A., Deutsch, E.W., Wang, R., Csordas, A., Reisinger, F., Rios, D., et al. (2014). ProteomeXchange provides globally coordinated proteomics data submission and dissemination. *Nature Biotechnology* 32, 223-226. doi: 10.1038/nbt.2839
- Wisniewski, J.R., Zougman, A., Nagaraj, N., and Mann, M. (2009). Universal sample preparation method for proteome analysis. *Nat. Methods.* 6, 359-362. doi: 10.1038/nmeth.1322
